# Supplementary material for: Dual intervention on the gut and skin microbiota attenuates facial cutaneous aging
Source: Royal Society of Chemistry journal article supplement (doi:10.1039/d3fo05473j), 2024-01-01
Supplement: d3fo05473j1.pdf [file d3fo05473j1.pdf]

## Appendix

### Supplementary figures

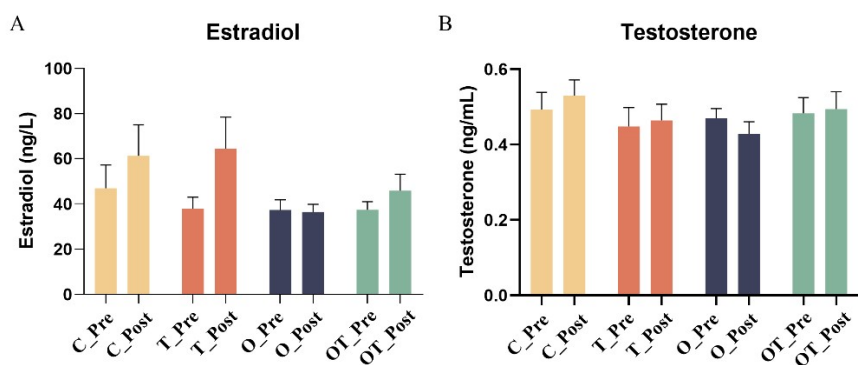

Fig. S1. Changes of sex hormone (A) estradiol, and (B) testosterone secretion levels in each group pre- and post-intervention. Data are presented as the Means  $\pm$  SEM.

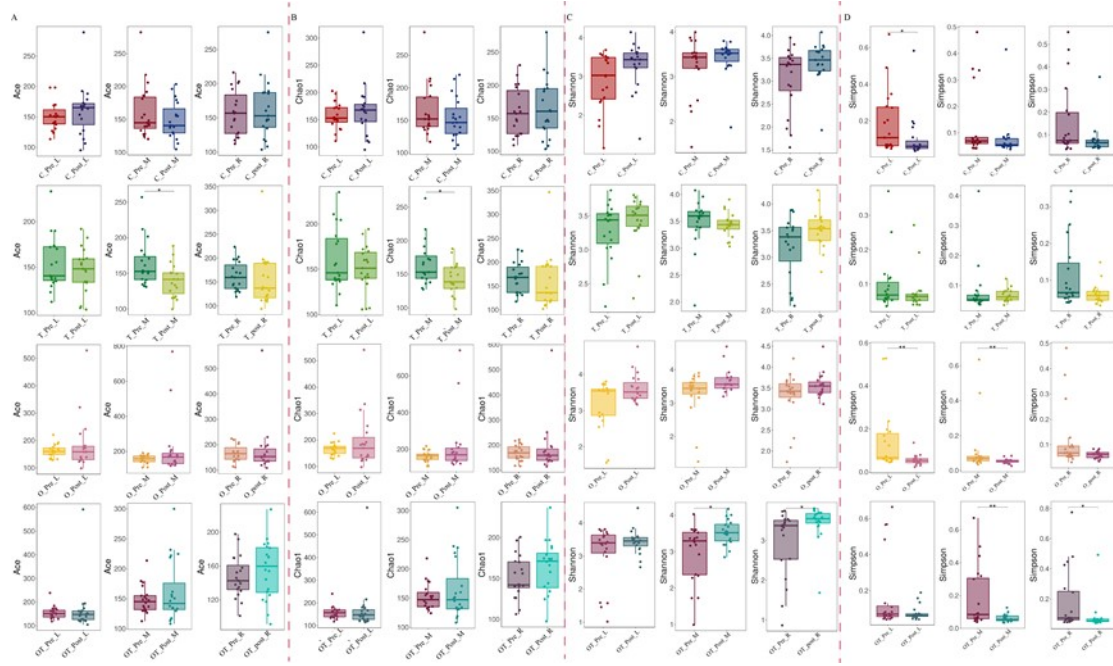

Fig. S2  $\alpha$ -diversity (A) Ace index, (B) Chao1 index, (C) Shannon index, and (D) Simpson index of skin microbiota in each group pre- and post-intervention.

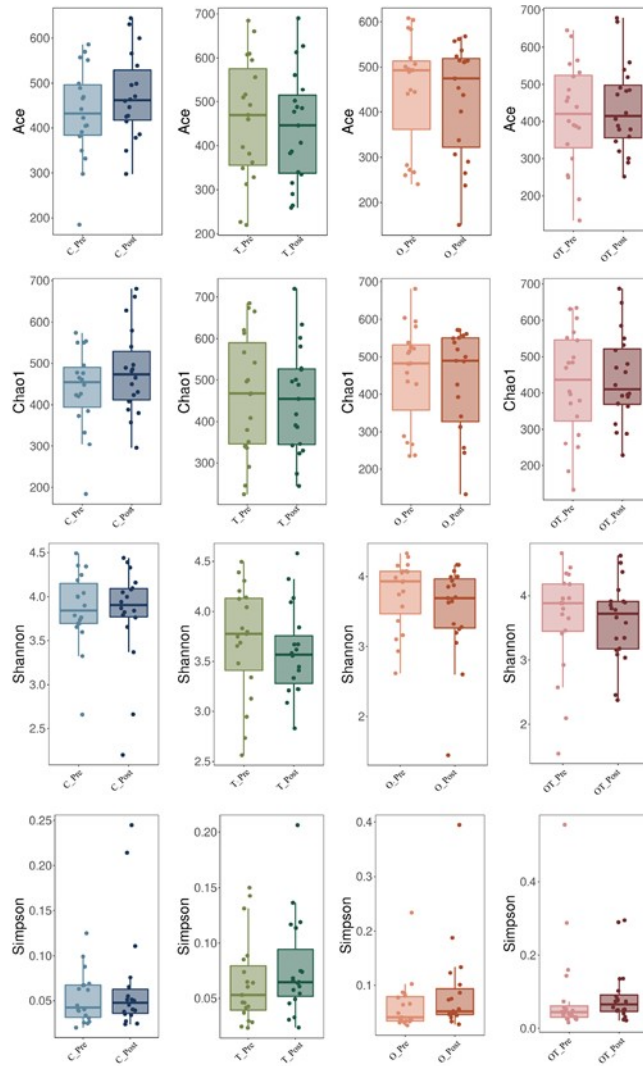

Fig. S3  $\alpha$ -diversity (A) Ace index, (B) Chao1 index, (C) Shannon index, and (D) Simpson index of gut microbiota pre- and post-intervention.

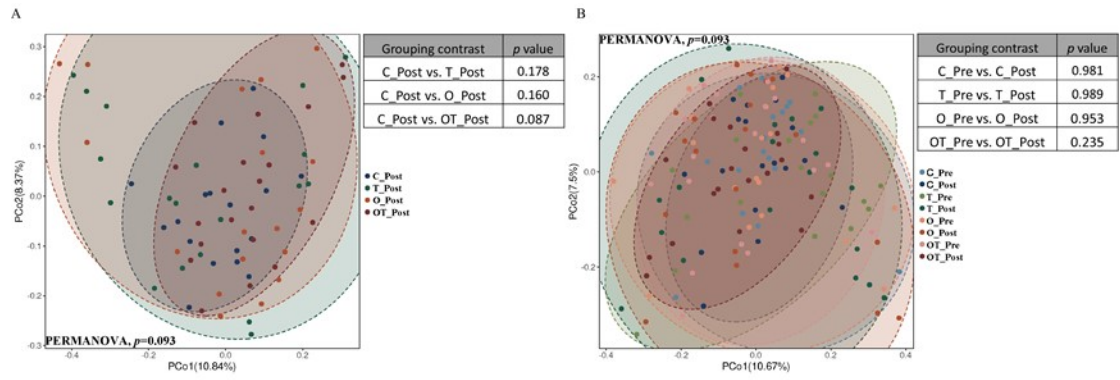

Fig. S4 PCoA of gut microbiota in (A) T\_Post, O\_Post, and OT\_Post compared with C\_Post group, and (B) each group pre- and post-intervention.

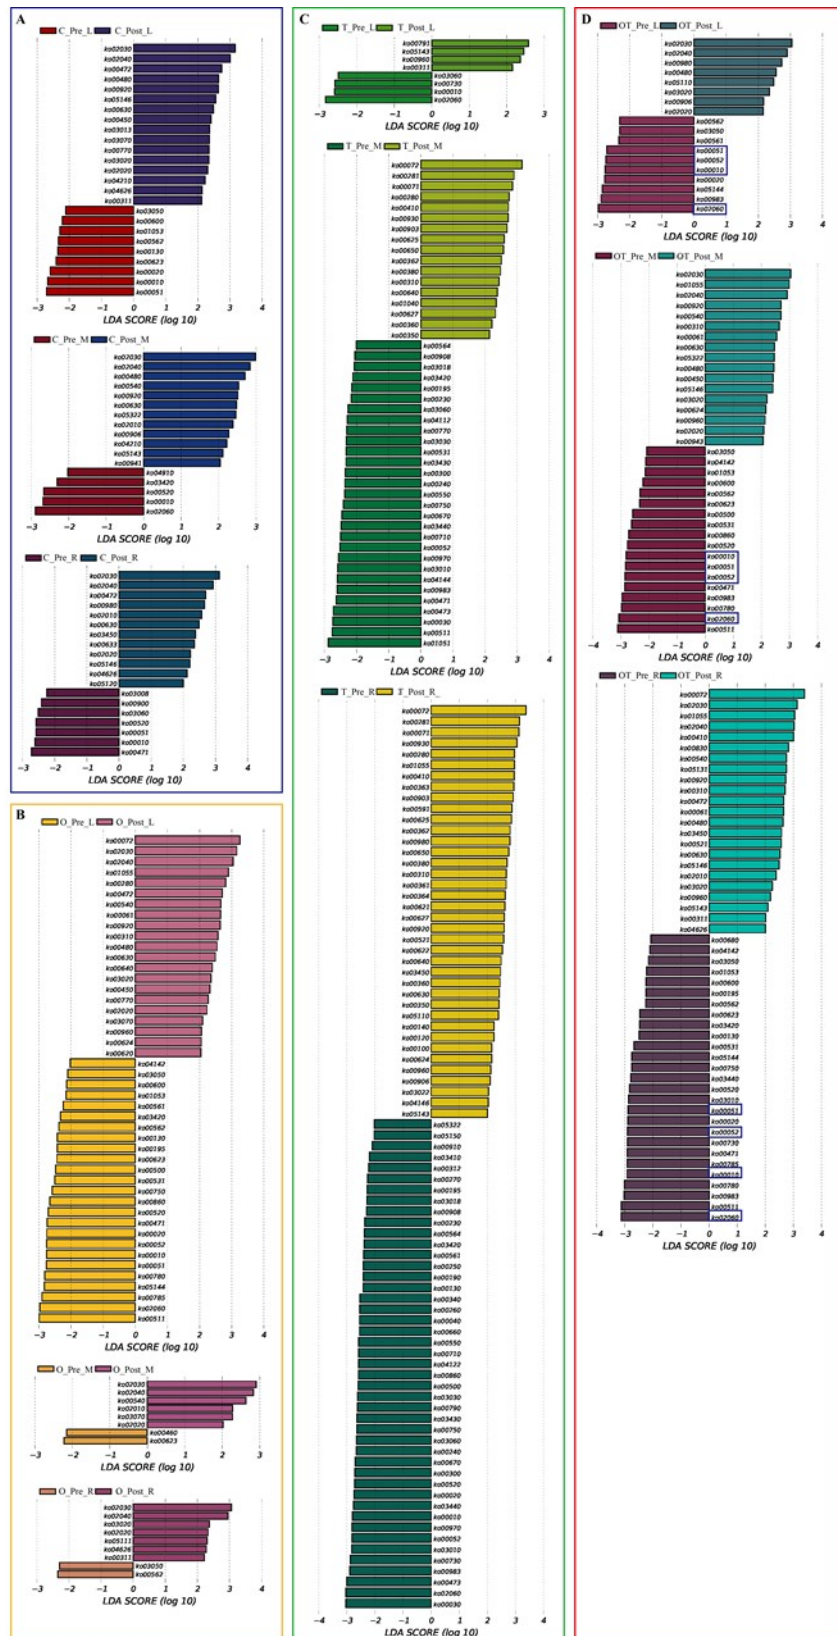

Fig. S5 Differential pathway of skin microbiota in (A) C group, (B) O group, (C) T group, and (D) OT group at the left-, forehead, and right-side facial skin sites pre- and post-intervention, respectively.

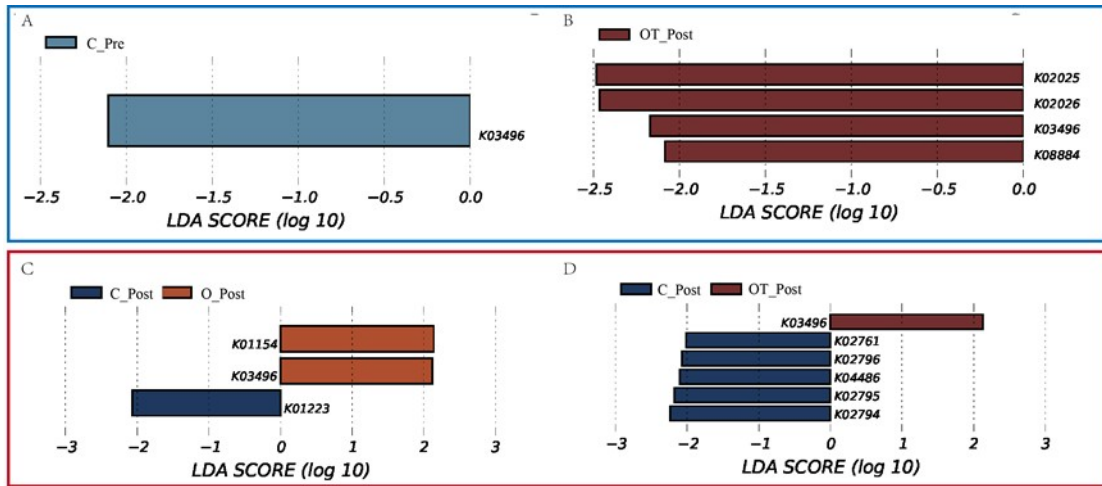

Fig. S6 Differential KO of gut microbiota in (A) each group pre- and post-intervention, and (B) each post-intervention group compared with C post-intervention group.

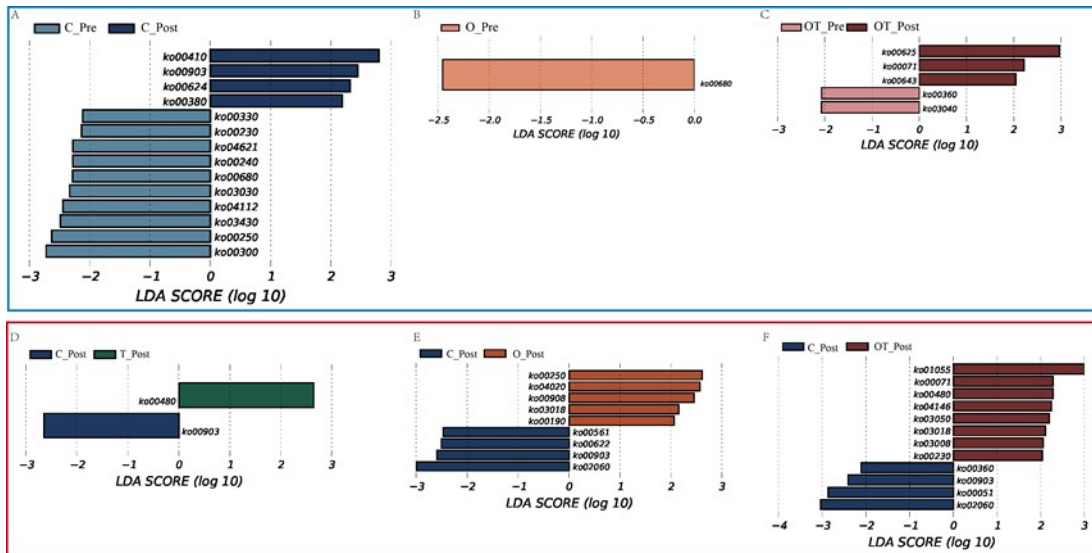

Fig. S7 Differential pathways of gut microbiota in (A) each group pre- and post-intervention, and (B) each post-intervention group compared with C post-intervention group.
